# Supplementary material
Source: HighWire-hosted journal article supplement (https://gut.bmj.com/content/72/4/663)

# Risk of developing IBD according to...

## ...Time since last course of antibiotics

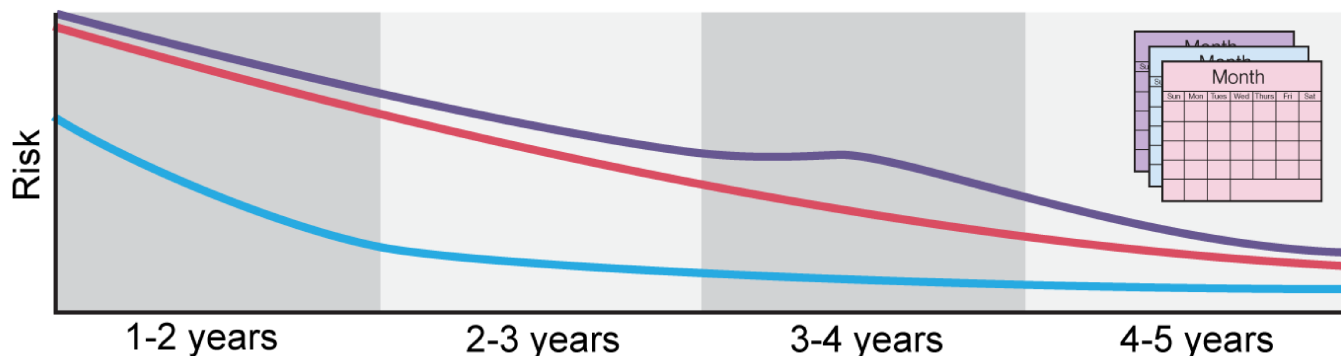

## ...Antibiotic class

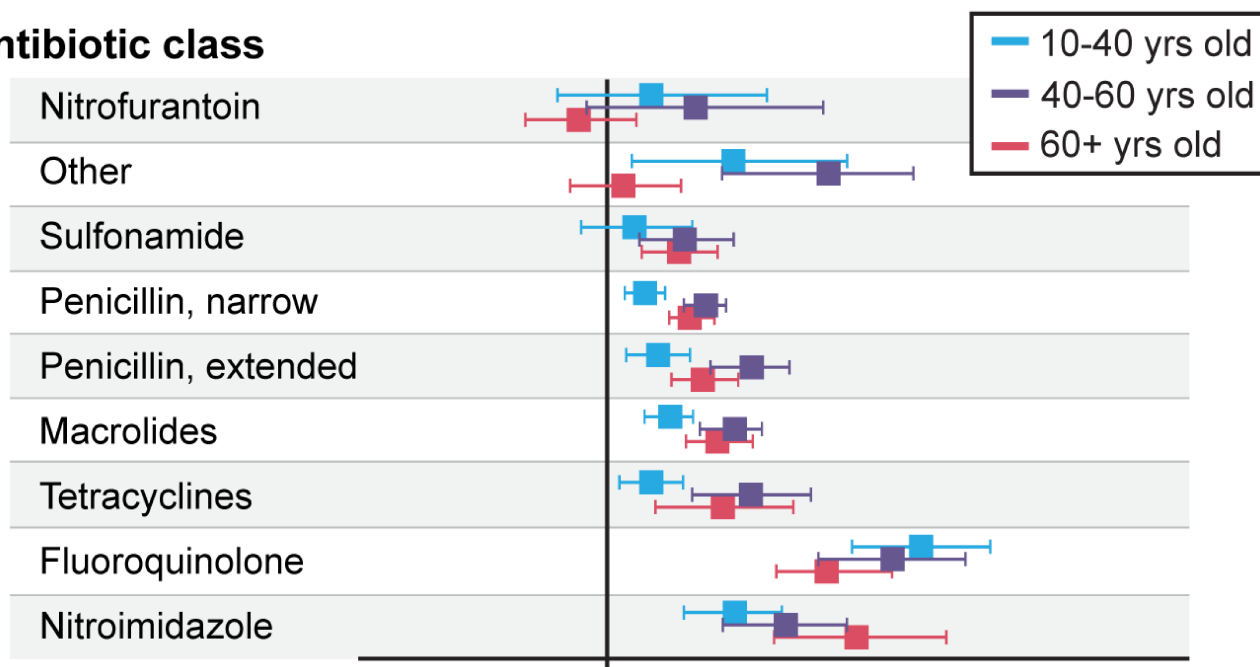

## ...Number of courses of antibiotics

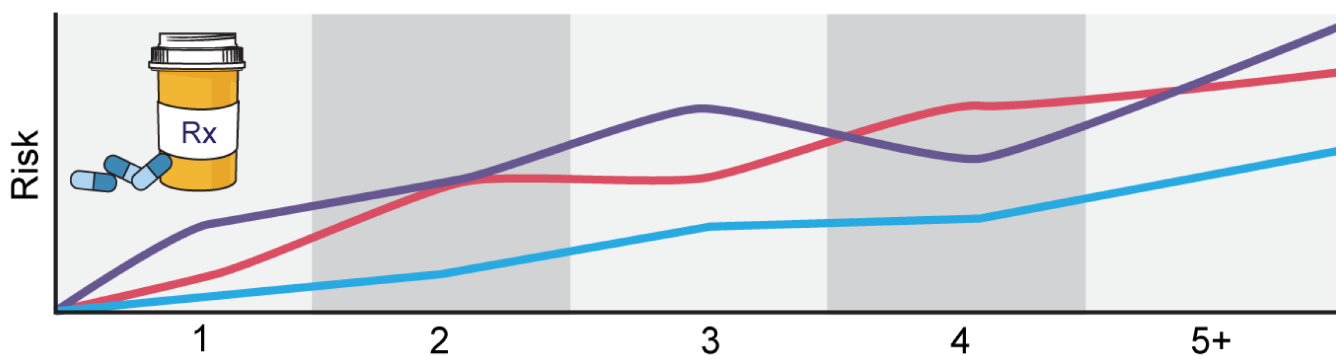

Supplement: inline-supplementary-material-2 [file inline-supplementary-material-2.pdf]
